# Supplementary material
Source: PubMed Central journal article supplement (PMC6645878)
Supplement: ao7b01808_si_001.pdf [file ao7b01808_si_001.pdf]

## Initiation, Elongation and Termination of Bacterial Cellulose Synthesis

John B. McManus<sup>a</sup>, Hui Yang<sup>b</sup>, Liza Wilson<sup>b</sup>, James D. Kubicki<sup>c</sup> and Ming Tien<sup>a,\*</sup>

<sup>a</sup>Department of Biochemistry and Molecular Biology, The Pennsylvania State University, PA 16802, USA, <sup>b</sup> Department of Biology, University Park, The Pennsylvania State University, PA 16802, USA, <sup>c</sup> Department of Geological Sciences, University of Texas at El Paso, El Paso, TX, 79968, USA

**\*Corresponding author:** Ming Tien, Department of Biochemistry and Molecular Biology  
Pennsylvania State University, University Park, PA 16802. Email: [mxt3@psu.edu](mailto:mxt3@psu.edu)

## Supplemental Material

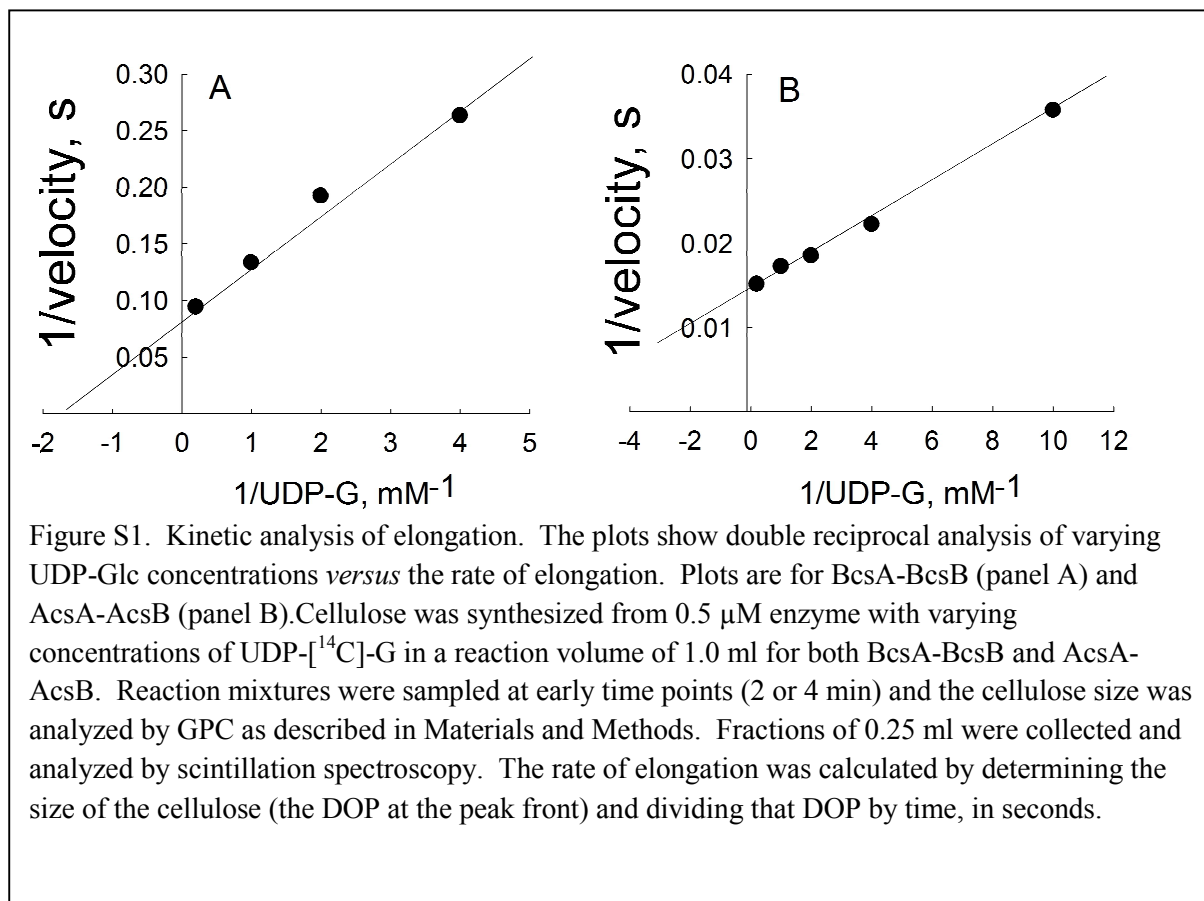

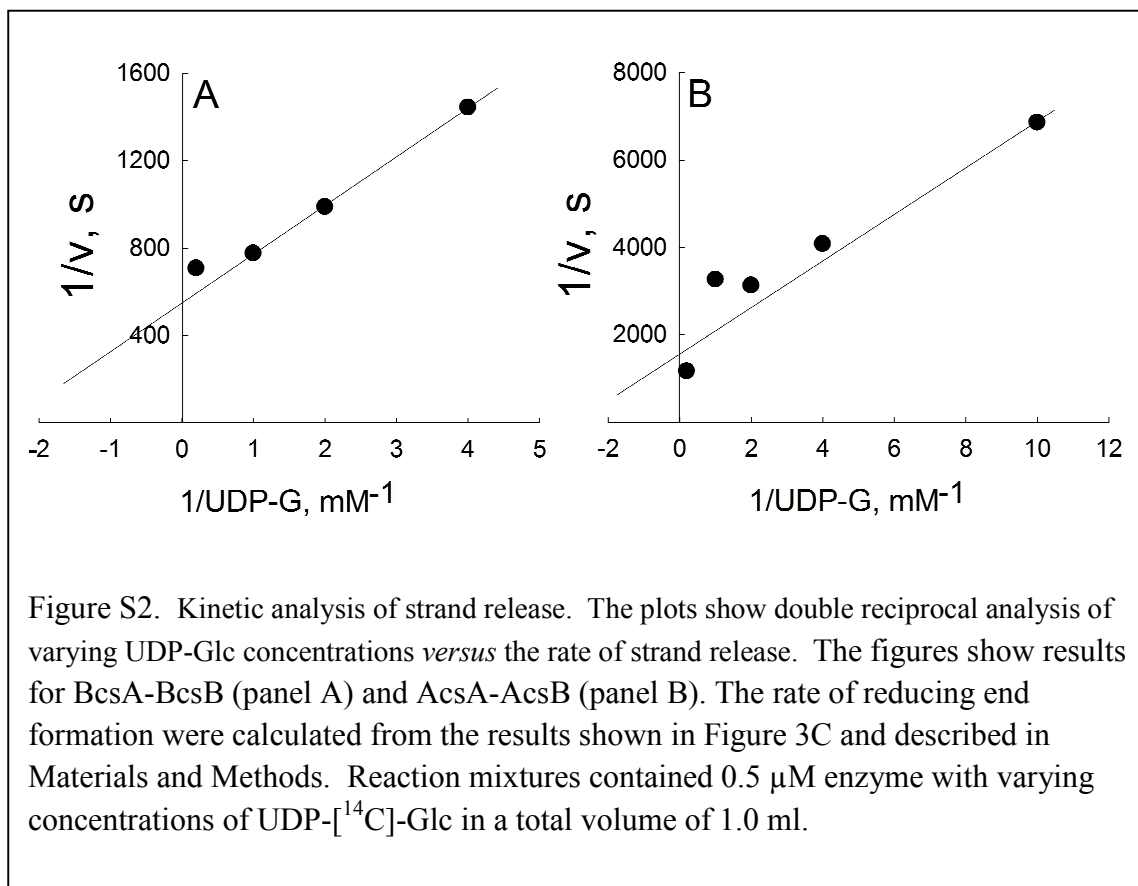

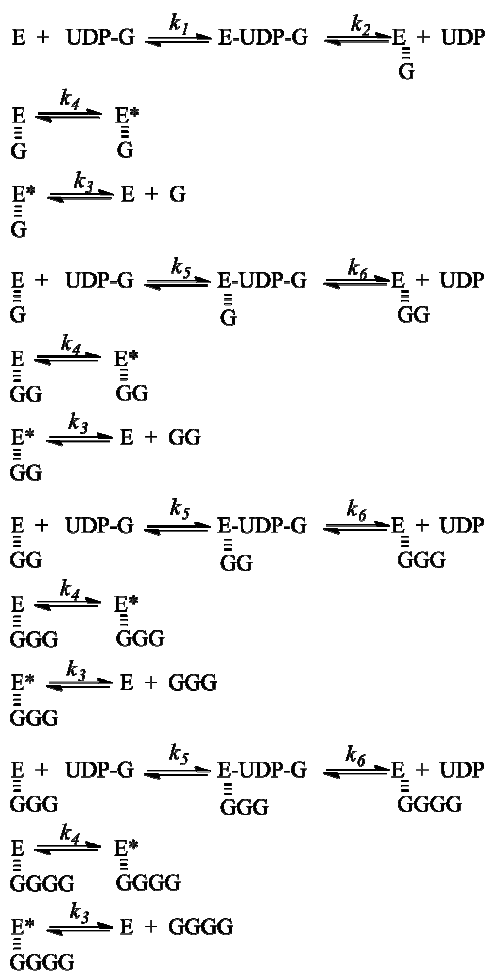

Figure S3. The mechanism used for the Kinsim simulation shown in Figure 4. The asterisk (\*) designation indicates translocation into the cellulose exit channel.

Figure S4. Mechanism used for Tenua input.

EA0 + UG <-> UGEB0 <-> EB1 + U ;  
EB1 <->EA1 ;  
EA1 + UG <-> UGEB1 <-> EB2 + U ;  
EB2 <->EA2 ;  
EA2 + UG <-> UGEB2 <-> EB3 + U ;  
EB3 <->EA3 ;  
EA3 + UG <-> UGEB3 <-> EB4 + U ;  
EB4 <->EA4 ;  
EA4 + UG <-> UGEB4 <-> EB5 + U ;  
EB5 <->EA5 ;  
EA5 + UG <-> UGEB5 <-> EB6 + U ;  
EB6 <->EA6 ;  
EA6 + UG <-> UGEB6 <-> EB7 + U ;  
EB7 <->EA7 ;  
EA7 + UG <-> UGEB7 <-> EB8 + U ;  
EB8 <->EA8 ;  
EA8 + UG <-> UGEB8 <-> EB9 + U ;  
EB9 <->EA9 ;  
EA9 + UG <-> UGEB9 <-> EB10 + U ;  
EB10 <->EA10 ;  
EA10 + UG <-> UGEB10 <-> EB11 + U ;  
EB11 <->EA11 ;  
EA11 + UG <-> UGEB11 <-> EB12 + U ;  
EB12 <->EA12 ;  
EA12 + UG <-> UGEB12 <-> EB13 + U ;  
EB13 <->EA13 ;  
EA13 + UG <-> UGEB13 <-> EB14 + U ;  
EB14 <->EA14 ;  
EA14 + UG <-> UGEB14 <-> EB15 + U ;  
EB15 <->EA15 ;  
EA15 + UG <-> UGEB15 <-> EB16 + U ;  
EB16 <->EA16 ;  
EA16 + UG <-> UGEB16 <-> EB17 + U ;  
EB17 <->EA17 ;  
EA17 + UG <-> UGEB17 <-> EB18 + U ;  
EB18 <->EA18 ;  
EA18 + UG <-> UGEB18 <-> EB19 + U ;  
EB19 <->EA19 ;  
EA19 + UG <-> UGEB19 <-> EB20 + U ;  
EB20 <->EA20 ;  
EA20 + UG <-> UGEB20 <-> EB21 + U ;  
EB21 <->EA21 ;  
EA21 + UG <-> UGEB21 <-> EB22 + U ;  
EB22 <->EA22 ;  
EA22 + UG <-> UGEB22 <-> EB23 + U ;  
EB23 <->EA23 ;  
EA23 + UG <-> UGEB23 <-> EB24 + U ;  
EB24 <->EA24 ;  
EA24 + UG <-> UGEB24 <-> EB25 + U ;  
EB25 <->EA25 ;  
EA25 + UG <-> UGEB25 <-> EB26 + U ;  
EB26 <->EA26 ;  
EA26 + UG <-> UGEB26 <-> EB27 + U ;  
EB27 <->EA27 ;  
EA27 + UG <-> UGEB27 <-> EB28 + U ;  
EB28 <->EA28 ;  
EA28 + UG <-> UGEB28 <-> EB29 + U ;  
EB29 <->EA29 ;  
EA29 + UG <-> UGEB29 <-> EB30 + U ;  
EB30 <->EA30 ;  
EA30 + UG <-> UGEB30 <-> EB31 + U ;  
EB31 <->EA31 ;

EA31 + UG <-> UGEB31 <-> EB32 + U ;  
EB32 <->EA32 ;  
EA32 + UG <-> UGEB32 <-> EB33 + U ;  
EB33 <->EA33 ;  
EA33 + UG <-> UGEB33 <-> EB34 + U ;  
EB34 <->EA34 ;  
EA34 + UG <-> UGEB34 <-> EB35 + U ;  
EB35 <->EA35 ;  
EA35 + UG <-> UGEB35 <-> EB36 + U ;  
EB36 <->EA36 ;  
EA36 + UG <-> UGEB36 <-> EB37 + U ;  
EB37 <->EA37 ;  
EA37 + UG <-> UGEB37 <-> EB38 + U ;  
EB38 <->EA38 ;  
EA38 + UG <-> UGEB38 <-> EB39 + U ;  
EB39 <->EA39 ;  
EA39 + UG <-> UGEB39 <-> EB40 + U ;  
EB40 <->EA40 ;  
EA40 + UG <-> UGEB40 <-> EB41 + U ;  
EB41 <->EA41 ;  
EA41 + UG <-> UGEB41 <-> EB42 + U ;  
EB42 <->EA42 ;  
EA42 + UG <-> UGEB42 <-> EB43 + U ;  
EB43 <->EA43 ;  
EA43 + UG <-> UGEB43 <-> EB44 + U ;  
EB44 <->EA44 ;  
EA44 + UG <-> UGEB44 <-> EB45 + U ;  
EB45 <->EA45 ;  
EA45 + UG <-> UGEB45 <-> EB46 + U ;  
EB46 <->EA46 ;  
EA46 + UG <-> UGEB46 <-> EB47 + U ;  
EB47 <->EA47 ;  
EA47 + UG <-> UGEB47 <-> EB48 + U ;  
EB48 <->EA48 ;  
EA48 + UG <-> UGEB48 <-> EB49 + U ;  
EB49 <->EA49 ;  
EA49 + UG <-> UGEB49 <-> EB50 + U ;  
EB50 <->EA50 ;  
EA50 + UG <-> UGEB50 <-> EB51 + U ;  
EB1 <-> EA0 + T1 ;  
EB2 <-> EA0 + T2 ;  
EB3 <-> EA0 + T3 ;  
EB4 <-> EA0 + T4 ;  
EB5 <-> EA0 + T5 ;  
EB6 <-> EA0 + T6 ;  
EB7 <-> EA0 + T7 ;  
EB8 <-> EA0 + T8 ;  
EB9 <-> EA0 + T9 ;  
EB10 <-> EA0 + T10 ;  
EB11 <-> EA0 + T11 ;  
EB12 <-> EA0 + T12 ;  
EB13 <-> EA0 + T13 ;  
EB14 <-> EA0 + T14 ;  
EB15 <-> EA0 + T15 ;  
EB16 <-> EA0 + T16 ;  
EB17 <-> EA0 + T17 ;  
EB18 <-> EA0 + T18 ;  
EB19 <-> EA0 + T19 ;  
EB20 <-> EA0 + T20 ;  
EB21 <-> EA0 + T21 ;  
EB22 <-> EA0 + T22 ;  
EB23 <-> EA0 + T23 ;  
EB24 <-> EA0 + T24 ;  
EB25 <-> EA0 + T25 ;  
EB26 <-> EA0 + T26 ;  
EB27 <-> EA0 + T27 ;

EB28 <-> EA0 + T28 ;  
EB29 <-> EA0 + T29 ;  
EB30 <-> EA0 + T30 ;  
EB31 <-> EA0 + T31 ;  
EB32 <-> EA0 + T32 ;  
EB33 <-> EA0 + T33 ;  
EB34 <-> EA0 + T34 ;  
EB35 <-> EA0 + T35 ;  
EB36 <-> EA0 + T36 ;  
EB37 <-> EA0 + T37 ;  
EB38 <-> EA0 + T38 ;  
EB39 <-> EA0 + T39 ;  
EB40 <-> EA0 + T40 ;  
EB41 <-> EA0 + T41 ;  
EB42 <-> EA0 + T42 ;  
EB43 <-> EA0 + T43 ;  
EB44 <-> EA0 + T44 ;  
EB45 <-> EA0 + T45 ;  
EB46 <-> EA0 + T46 ;  
EB47 <-> EA0 + T47 ;  
EB48 <-> EA0 + T48 ;  
EB49 <-> EA0 + T49 ;  
EB50 <-> EA0 + T50 ;  
EB51 <-> EA0 + T51 ;
